# Supplementary material
Source: PubMed Central journal article supplement (PMC7598567)
Supplement: mmc1.pdf [file mmc1.pdf]

Table S1. The viral load and days after symptom onset of the 3931 respiratory specimens collected from COVID-19 patients with Ct values  $\leq 18.57$  and  $>18.57$

| Case         | Total | Ct range |              | % $\leq 18.57$ |
|--------------|-------|----------|--------------|----------------|
|              |       | $>18.57$ | $\leq 18.57$ |                |
| All          | 3931  | 2995     | 936          | 23.8%          |
| Asymptomatic | 604   | 531      | 73           | 12.1%          |
| Symptomatic  | 3327  | 2464     | 863          | 25.9%          |

Symptomatic cases

Days after clinical onset

|          |      |      |     |                |
|----------|------|------|-----|----------------|
| $>1$     |      | 1818 | 496 |                |
| $\leq 1$ | 1013 | 646  | 367 |                |
| Total    |      |      | 863 |                |
| $>2$     |      | 1516 | 298 | 34.5% 298/863  |
| $\leq 2$ | 1513 | 948  | 565 | 37.3% 565/1513 |
|          |      |      | 863 |                |
| $>3$     |      | 1249 | 176 | 20.4% 176/863  |
| $\leq 3$ | 1902 | 1215 | 687 | 36.1% 687/1902 |
|          |      |      | 863 |                |
| $>4$     |      | 1017 | 101 | 11.7% 101/863  |
| $\leq 4$ | 2209 | 1447 | 762 | 34.5% 762/2209 |
|          |      |      | 863 |                |
| $>5$     |      | 827  | 49  | 5.7% 49/863    |
| $\leq 5$ | 2451 | 1637 | 814 | 33.2% 814/2451 |
|          |      |      | 863 |                |
| $>6$     |      | 644  | 35  | 4.1% 35/863    |
| $\leq 6$ | 2648 | 1820 | 828 | 31.3% 828/2648 |
|          |      |      | 863 |                |
| $>7$     |      | 521  | 25  | 2.9% 25/863    |
| $\leq 7$ | 2781 | 1943 | 838 | 30.1% 838/2781 |
|          |      |      | 863 |                |

% calculated by the following:

57.5% 496/863 (the proportion of specimens having Ct  $\leq 18.57$ , collected  $>$ day 1 after clinical onset)  
 36.2% 367/1013 (the proportion of specimens collected  $\leq$ day 1 after clinical onset, having Ct  $\leq 18.57$ )
