# Supplementary material
Source: PubMed Central journal article supplement (PMC7598567)
Supplement: mmc2.pdf [file mmc2.pdf]

Table S2. The viral load and days after symptom onset of the 3931 respiratory specimens collected from COVID-19 patients with Ct values  $\leq 28.67$  and  $> 28.67$

| Case         | Total | Ct range  |              | % $\leq 28.67$ |
|--------------|-------|-----------|--------------|----------------|
|              |       | $> 28.67$ | $\leq 28.67$ |                |
| All          | 3931  | 1198      | 2733         | 69.5%          |
| Asymptomatic | 604   | 323       | 281          | 46.5%          |
| Symptomatic  | 3327  | 875       | 2452         | 73.7%          |

  

Symptomatic cases

| Days after clinical onset | Total | $> 28.67$ | $\leq 28.67$ | % $\leq 28.67$ | % calculated by the following:                                                                            |
|---------------------------|-------|-----------|--------------|----------------|-----------------------------------------------------------------------------------------------------------|
| $> 1$                     | 1013  | 681       | 1633         | 66.6%          | 1633/2452 (the proportion of specimens having Ct $\leq 28.67$ , collected $>$ day 1 after clinical onset) |
| $\leq 1$                  |       | 194       | 819          |                |                                                                                                           |
| Total                     |       |           | 2452         |                |                                                                                                           |
| $> 2$                     | 1513  | 599       | 1215         | 49.6%          | 1215/2452                                                                                                 |
| $\leq 2$                  |       | 276       | 1237         |                |                                                                                                           |
|                           |       |           | 2452         |                |                                                                                                           |
| $> 3$                     | 1902  | 521       | 904          | 36.9%          | 904/2452                                                                                                  |
| $\leq 3$                  |       | 354       | 1548         |                |                                                                                                           |
|                           |       |           | 2452         |                |                                                                                                           |
| $> 4$                     | 2209  | 466       | 652          | 26.6%          | 652/2452                                                                                                  |
| $\leq 4$                  |       | 409       | 1800         |                |                                                                                                           |
|                           |       |           | 2452         |                |                                                                                                           |
| $> 5$                     | 2451  | 430       | 446          | 18.2%          | 446/2452                                                                                                  |
| $\leq 5$                  |       | 445       | 2006         |                |                                                                                                           |
|                           |       |           | 2452         |                |                                                                                                           |
| $> 6$                     | 2648  | 359       | 320          | 13.1%          | 320/2452                                                                                                  |
| $\leq 6$                  |       | 516       | 2132         |                |                                                                                                           |
|                           |       |           | 2452         |                |                                                                                                           |
| $> 7$                     | 2781  | 316       | 230          | 9.4%           | 230/2452                                                                                                  |
| $\leq 7$                  |       | 559       | 2222         |                |                                                                                                           |
|                           |       |           | 2452         |                |                                                                                                           |
