# Supplementary material
Source: PubMed Central journal article supplement (PMC7598567)

Fig. S1. NPA & TS

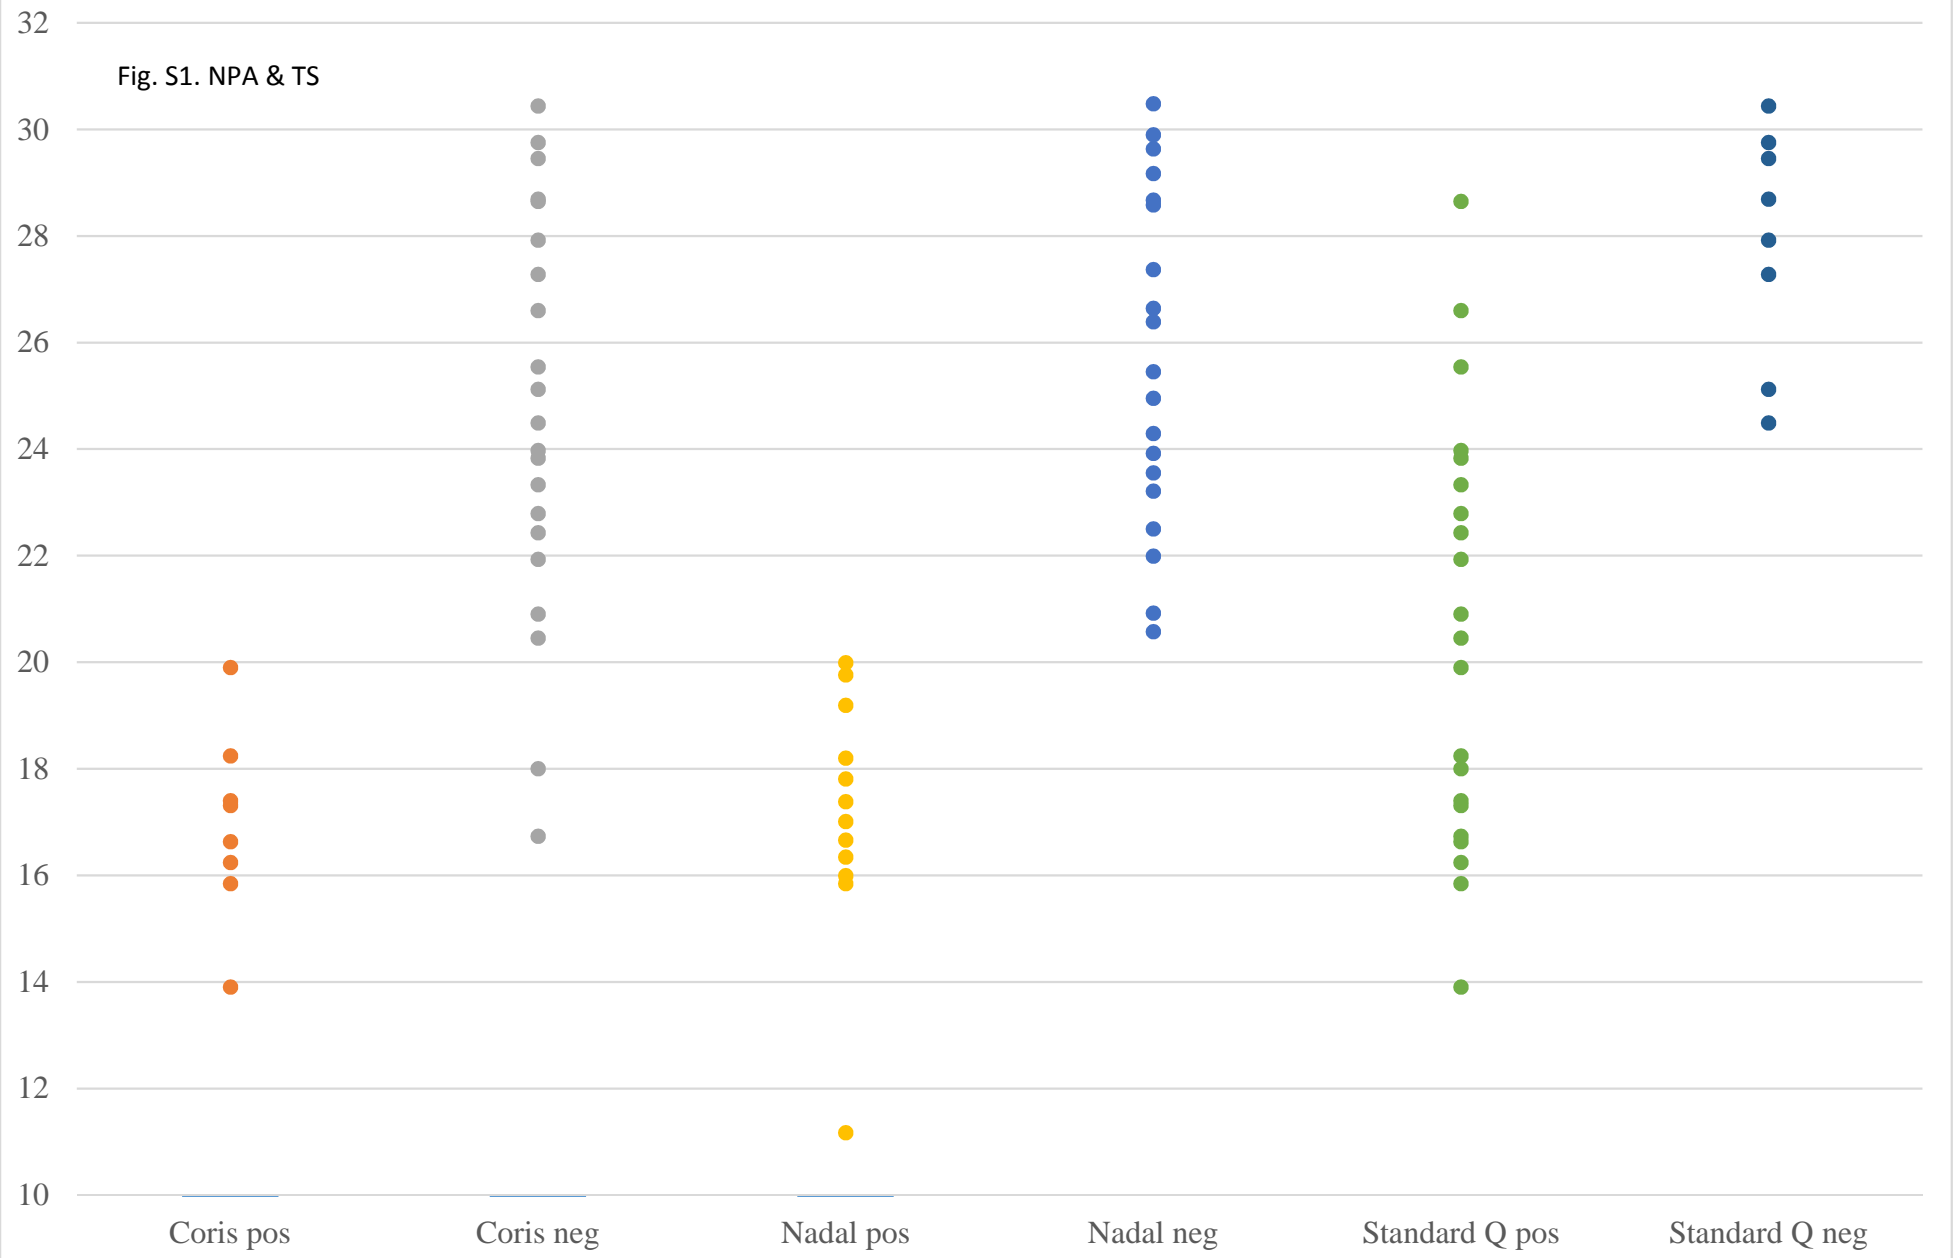

Supplement: mmc4.pdf [file mmc4.pdf]

Fig. S2. NPS & TS

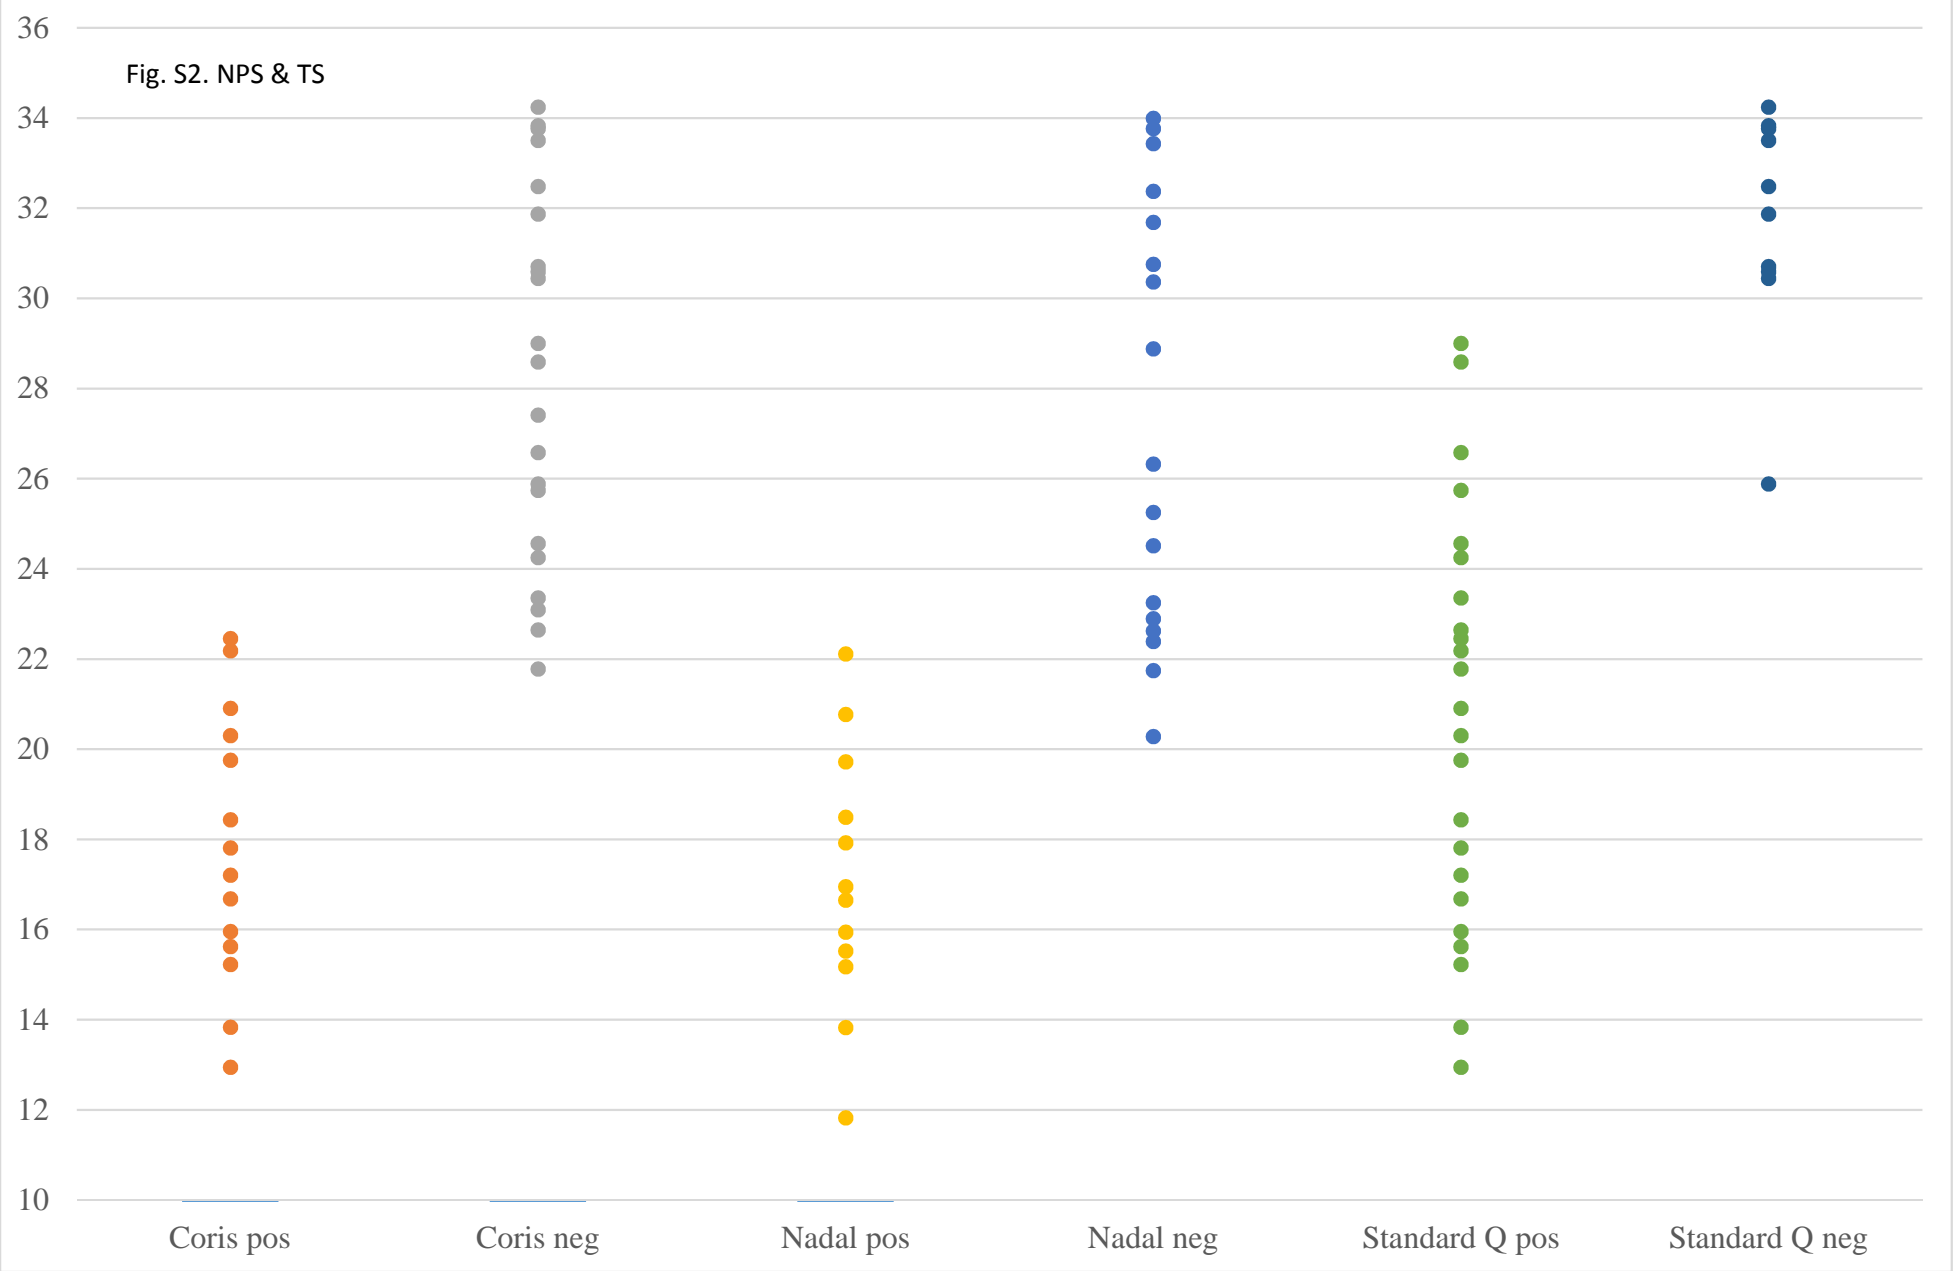

Supplement: mmc5.pdf [file mmc5.pdf]

Fig. S4. throat saliva

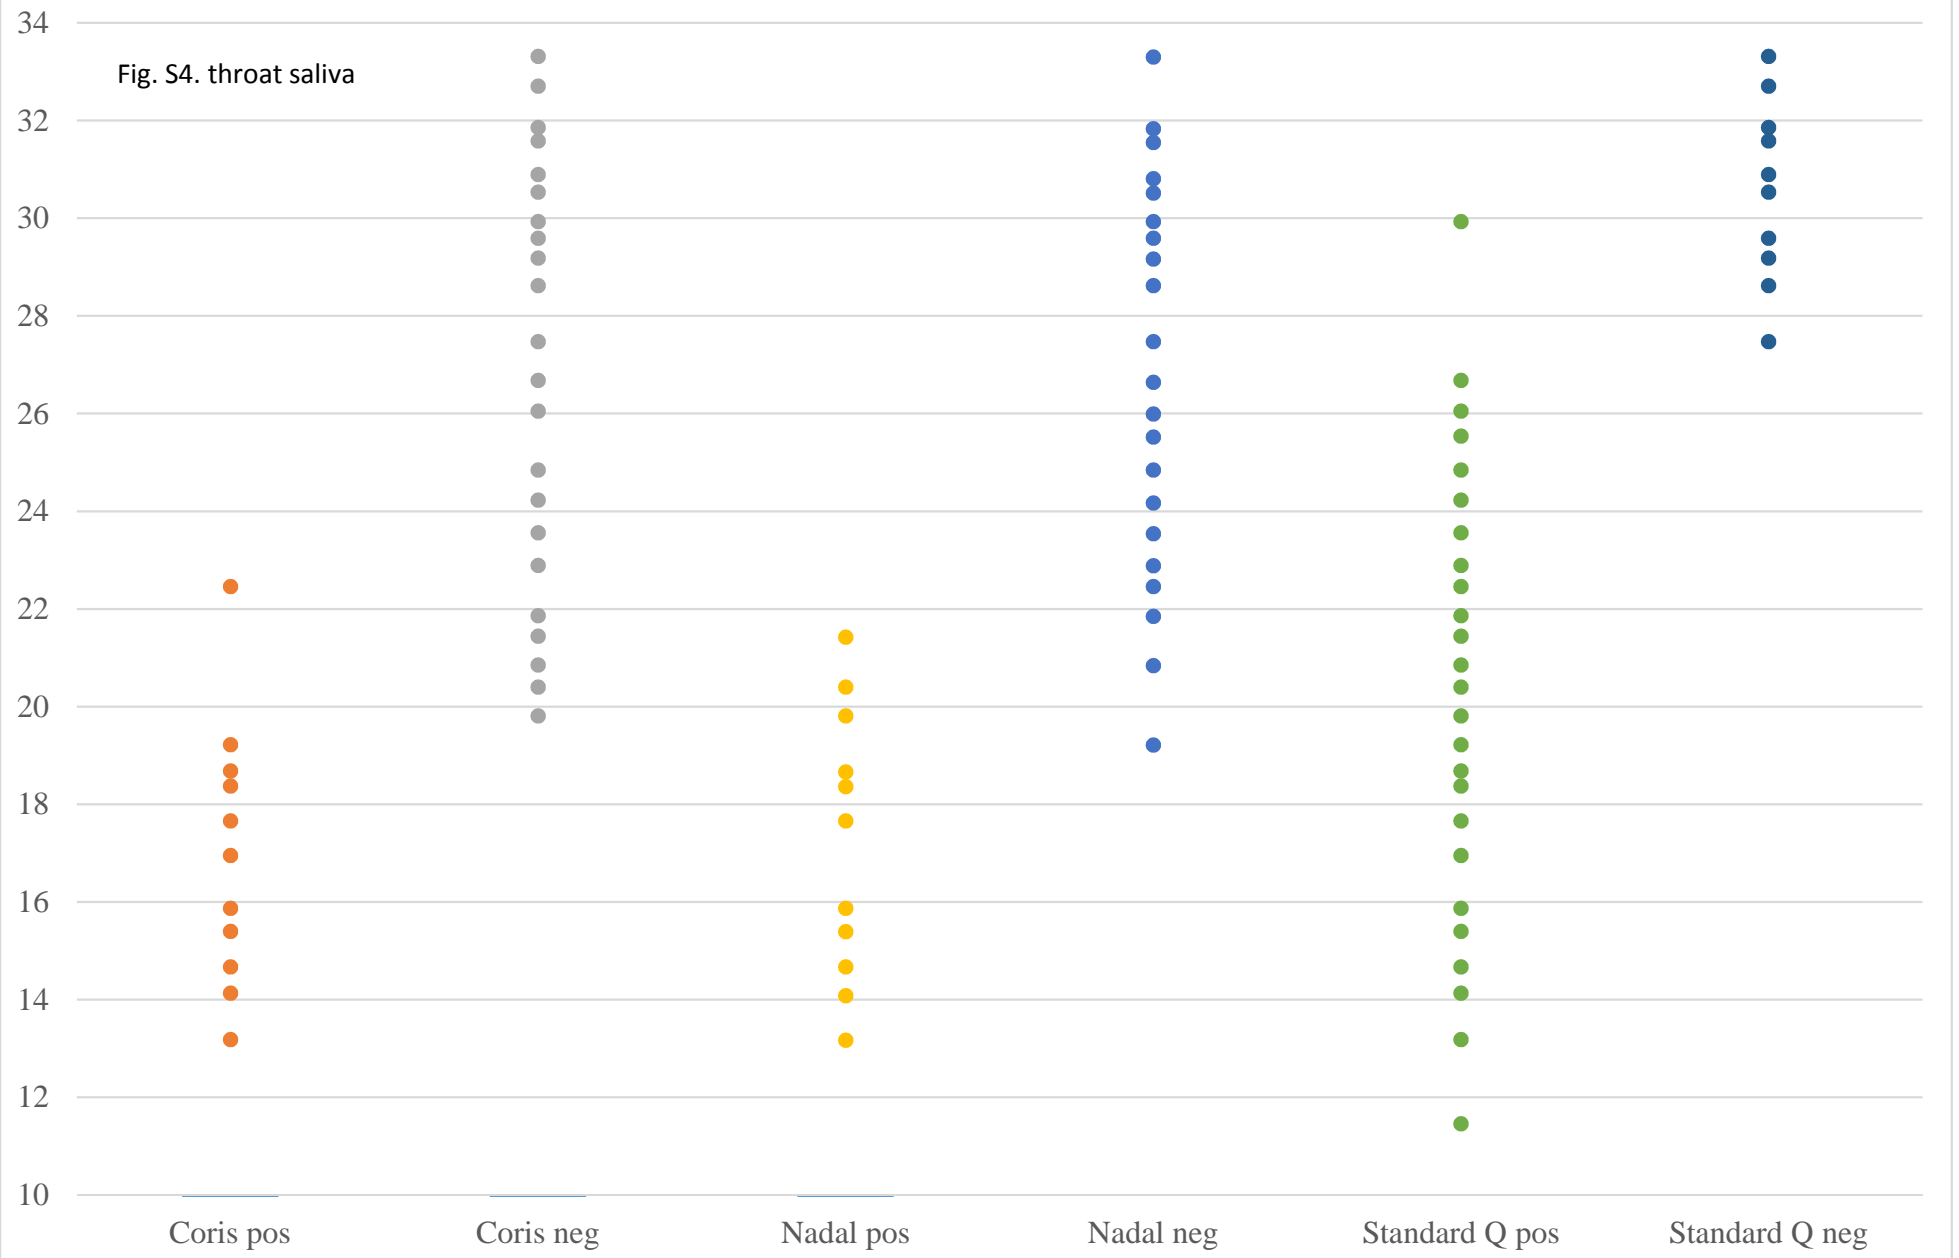

Supplement: mmc7.pdf [file mmc7.pdf]
